# Supplementary material for: Increased Cellular Presence After Sciatic Neurectomy Improves the Bone Mechano-adaptive Response in Aged Mice
Source: Springer Nature journal article supplement (doi:10.1007/s00223-019-00572-7), 2019-06-26
Supplement: MOESM1 [file 16856276]

**Supplementary Figures**

| 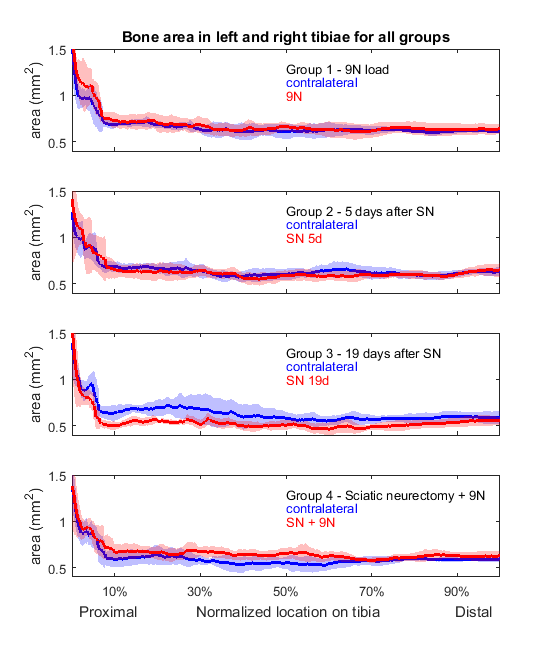 |
| --- |
| Figure S1: bone area in contralateral (left, in blue) and treated (right, in red) tibiae, for all groups. Solid line: mean value, shaded area: standard deviation. |

| 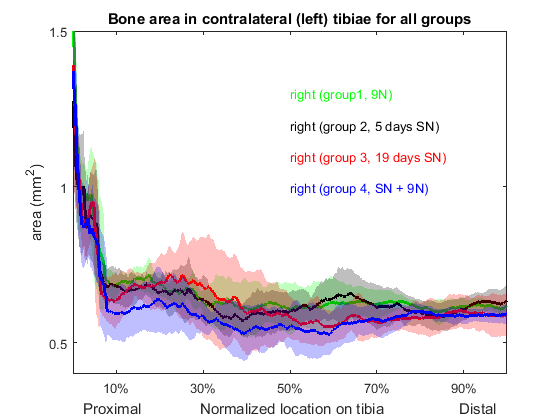 |
| --- |
| Figure S2: Bone area in contralateral (left) tibiae, in all groups. One-way ANOVA tests on the average bone area in Spm1d indicate that no group is different from the others (α = 0.05). |

| 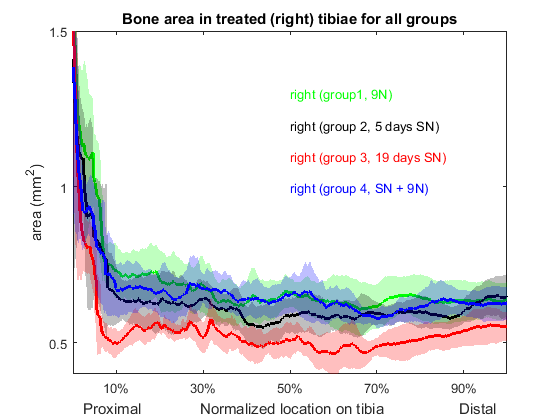 |
| --- |
| Figure S3: Bone area in treated (right) tibiae, in all groups. One-way ANOVA tests on the average bone area in Spm1d indicate that group 3 (19 days SN) is different from the other groups (α = 0.05). |
| 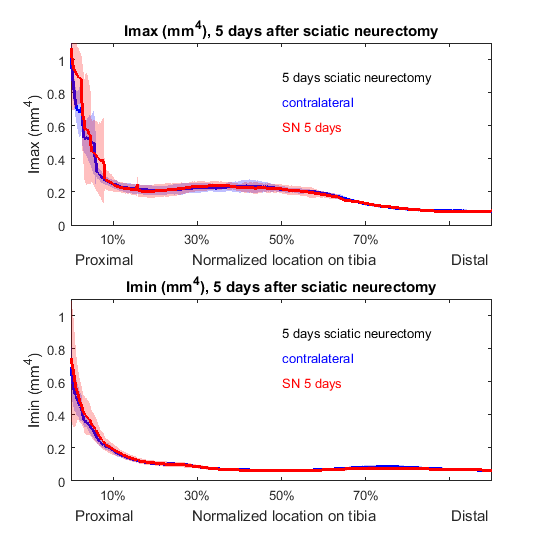 |
| Figure S4: Maximum and minimum moments of area in mice sacrificed 5 days following sciatic neurectomy. Solid line: mean value; shaded area: standard deviation. |
